# Supplementary material
Source: ML conference proceedings conference paper supplement (https://openaccess.thecvf.com/content/CVPR2025/html/Liu_Dynamic_Derivation_and_CVPR_2025_paper.html)
Supplement: Supplementary file 1 [file Liu_Dynamic_Derivation_and_CVPR_2025_supplemental.zip]

# Dynamic Derivation and Elimination: Audio Visual Segmentation with Enhanced Audio Semantics

Chen Liu<sup>1,4</sup>, Liying Yang<sup>5</sup>, Peike Li<sup>3</sup>, Dadong Wang<sup>4</sup>, Lincheng Li<sup>2</sup>, Xin Yu<sup>1\*</sup>

<sup>1</sup> The University of Queensland, <sup>2</sup> NetEase Fuxi AI Lab, <sup>3</sup> Matrix Verse AI,

<sup>4</sup> CSIRO Data61, <sup>5</sup> Macau University of Science and Technology

yenianliu36@gmail.com, xin.yu@uq.edu.au

## 1. More Quantitative Results

### 1.1. Efficiency Comparison

We report training time and inference FPS for recent transformer-based methods in Table 1, on AVSS with batch size 1 (A100 40GB, 224<sup>2</sup> pixels).

Table 1. Comparisons of inference and training time.

| Methods   | TPAVI    | AVSegFormer | AVSSStone | AVSBias | CAVP     | Ours     |
|-----------|----------|-------------|-----------|---------|----------|----------|
| Training  | 77h      | 46h         | 231h      | 1660h   | 56h      | 41h      |
| Inference | 15.4 fps | 23.4 fps    | 3.9 fps   | 1.4 fps | 25.9 fps | 58.5 fps |

### 1.2. More Backbone Comparisons

With PVT-V2-B5 and VGGish, our method still performs best on VPO, i.e., 73.58%, 73.35%, and 73.58%  $\mathcal{J}\&\mathcal{F}_\beta$  on VPO-SS, -MS, and -MSMI, respectively.

### 1.3. Comparison with AVSAC

AVSAC [1] addresses modality imbalance via bidirectional AV interaction and frame-wise synchrony, while DDESeg tackles feature fusion and matching difficulty by enhancing audio representations and dynamically eliminating non-visual audio elements. Our method outperforms AVSAC: 88.0% / 94.2% (S4), 70.4% / 77.9% (MS3), 39.7% / 67.9% (AVSS) on  $\mathcal{J}\&\mathcal{F}_m$ .

### 1.4. Performance on Difficult Cases

❶ **Tiny objects:** DDESeg may produce inferior masks when audible objects have weak visual cues. ❷ **Disappeared objects:** After sounding objects disappear, DDESeg will not segment silent objects as there is no AV correlation. ❸ **Noise accumulation:** Noise does not accumulate, as DEM eliminates visually irrelevant audio semantics.

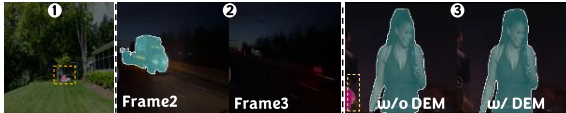

Figure 1. Visualizations of difficult cases.

\*Corresponding author.

## 2. More Implementation Details

We train our model for 100 epochs using the AdamW optimizer [2] and an initial learning rate of 1e-4, distributed across eight NVIDIA A100 GPUs. The learning rate is scheduled with a cosine annealing schedule, gradually decreasing throughout training. To ensure a fair comparison, all images are resized to a resolution of 224 × 224. Audio samples are processed at a sampling rate of 22,050 Hz, with a window size of 1024, a hop size of 320, and 644 mel bins, to compute STFTs and mel spectrograms.

## References

- [1] Tianxiang Chen, Zhentao Tan, Tao Gong, Qi Chu, Yue Wu, Bin Liu, Nenghai Yu, Le Lu, and Jieping Ye. Bootstrapping audio-visual video segmentation by strengthening audio cues. *IEEE Transactions on Circuits and Systems for Video Technology*, 2024. 1
- [2] I Loshchilov. Decoupled weight decay regularization. *arXiv preprint arXiv:1711.05101*, 2017. 1
